# Supplementary material for: Diversity in Metabolites and Fruit Quality Traits in Blueberry Enables Ploidy and Species Differentiation and Establishes a Strategy for Future Genetic Studies
Source: Front Plant Sci. 2020 Apr 3;11:370. doi: 10.3389/fpls.2020.00370 (PMC7147330; doi:10.3389/fpls.2020.00370)
Supplement: Supplementary file 2 [file Table_1.XLSX]

## Sheet: Supplementary Tables content
Supplementary Table S1. Blueberry accession ID, ploidy level, species, collection sites, pedigree and cultivar names. NHB = northern highbush blueberry, SHB = southern highbush blueberry, 2x= diploid, 4x=tetraploid and 6x=hexaploid.
Supplementary Table S2. Metabolites detected in this study
Supplementary Table S3. Phenotypic variability of metabolites and fruit quality traits.
Supplementary Table S4. Analysis of variance for metabolites content and fruit quality traits of blueberry accessions at ploidy levels over two growing seasons (2017 and 2018).

## Sheet: Supplementary Table S1
Supplementary Table S1. Blueberry accession ID, ploidy level, species, collection sites, pedigree and cultivar names. NHB = northern highbush blueberry, SHB = southern highbush blueberry, 2x= diploid, 4x=tetraploid and 6x=hexaploid.
Accession*	Ploidy*	Species*	Collection site*	Pedigree*	Type*	Name*
PI346623	2x	V.elliottii	Florida
PI346628	2x	V.elliottii	NC
PI346732	2x	V.elliottii	Maryland
PI554911	2x	V.elliottii	NC	V. elliottii NC 2846
PI554923	2x	V.elliottii	NC	V. elliottii NC 84-15-1
PI613650	2x	V.elliottii	NC
PI554665	4x	V.angustifolium	Canada
PI618230	4x	V.angustifolium	Canada
PI554942	4x	Hybrid	Minnesota			Northblue
PI554952	4x	Hybrid	Michigan	Berkeley x 19-H (lowbush x Pioneer seedling)	Halfhigh	Northland
PI554954	4x	Hybrid	Maryland
PI618068	4x	Hybrid	Washington
PI618164	4x	Hybrid	NJ	Elizabeth x US 75	SHB	Legacy
PI618167	4x	Hybrid	Oregon			Marimba
PI618193	4x	Hybrid	Mississippi	Sharpblue x (US 210 x Fla 4-76)	SHB	Biloxi
PI618194	4x	Hybrid	Florida	(Harrison x Avonblue) x Fla 2-5	SHB	Magnolia
PI618235	4x	Hybrid	Mississippi	G-180 x US 75	SHB	Cooper
PI618260	4x	Hybrid	NJ
PI618261	4x	Hybrid	NJ
PI638328	4x	Hybrid	NA
PI638331	4x	Hybrid	NA			US 847
PI638332	4x	Hybrid	NA
PI638333	4x	Hybrid	NA
PI638337	4x	Hybrid	NA
PI267847	4x	V.corymbosum	Maine	V. corymbosum DE599 Mt. Pisgah
PI267848	4x	V.corymbosum	New_York
PI267851	4x	V.corymbosum	Maine	V. corymbosum DE591 Waldo Co.3
PI296395	4x	V.corymbosum	New_York
PI296396	4x	V.corymbosum	Maine
PI296397	4x	V.corymbosum	Maine
PI296402	4x	V.corymbosum	Maine
PI296403	4x	V.corymbosum	Maine
PI296405	4x	V.corymbosum	Maine	V. corymbosum DE5009
PI296406	4x	V.corymbosum	Maine
PI296408	4x	V.corymbosum	Maine
PI296412	4x	V.corymbosum	Maine	V. corymbosum hybrid DE6318
PI554764	4x	V.corymbosum	NC	V. corymbosum NC 86-27-07
PI554782	4x	V.corymbosum	NC
PI554790	4x	V.corymbosum	Maine
PI554795	4x	V.corymbosum	Maine
PI554796	4x	V.corymbosum	Maine
PI554797	4x	V.corymbosum	Maine
PI554798	4x	V.corymbosum	NJ	Jersey x Pioneer	NHB	Atlantic
PI554799	4x	V.corymbosum	NJ
PI554801	4x	V.corymbosum	NJ	Brooks x Rubel	NHB	Concord
PI554803	4x	V.corymbosum	Washington
PI554804	4x	V.corymbosum	NJ	Wild selection	NHB	Grover
PI554805	4x	V.corymbosum	NJ	Stanley x GS-149 (Jersey x Pioneer)	NHB	Herbert
PI554806	4x	V.corymbosum	Maryland	GS-149 (Jersey x Pioneer) x Stanley	NHB	R-86
PI554807	4x	V.corymbosum	NC	Z-13 (Rancocas x Carter) x Stanley	NHB	Ivanhoe
PI554810	4x	V.corymbosum	NJ	(Brooks x Russell) x Rubel	NHB	June
PI554811	4x	V.corymbosum	NJ	Brooks x Sooy	NHB	Katharine
PI554812	4x	V.corymbosum	Washington	Pioneer x Harding	NHB	Olympia
PI554814	4x	V.corymbosum	NJ
PI554815	4x	V.corymbosum	NJ	Brooks x Sooy	NHB	Pioneer
PI554816	4x	V.corymbosum	NJ	394Y (Brooks x Russell) x Rubel	NHB	Rancocas
PI554818	4x	V.corymbosum	NJ	(Brooks x Chatsworth) x Rubel	NHB	Scammell
PI554820	4x	V.corymbosum	NJ	Katharine x Rubel	NHB	Stanley
PI554821	4x	V.corymbosum	Massachusetts			Wareham
PI554822	4x	V.corymbosum	Washington	Pioneer x Rubel	NHB	Washington
PI554823	4x	V.corymbosum	NJ	June x Cabot	NHB	Weymouth
PI554825	4x	V.corymbosum	Maryland	Wareham x Pioneer	NHB	USDA F-72
PI554826	4x	V.corymbosum	NJ	Brooks x Chatsworth	NHB	Cabot
PI554836	4x	V.corymbosum	Washington
PI554841	4x	V.corymbosum	NJ
PI554842	4x	V.corymbosum	NJ	Stanley x Weymouth	NHB	Collins
PI554843	4x	V.corymbosum	Maine			Patriot
PI554845	4x	V.corymbosum	Maryland	Earliblue x US 11-93	NHB	Spartan
PI554846	4x	V.corymbosum	Michigan	Berkeley x Mich. highbush selection 241	NHB	Bluejay
PI554847	4x	V.corymbosum	Michigan	Berkeley x 19-H (lowbush x Pioneer seedling)	NHB	Bluehaven
PI554849	4x	V.corymbosum	NC
PI554850	4x	V.corymbosum	NC	Weymouth x F-6 (Stanley x Crabbe 4)	NHB	Angola
PI554852	4x	V.corymbosum	NC	Weymouth x F-6 (Stanley x Crabbe 4)	NHB	Croatan
PI554855	4x	V.corymbosum	NC
PI554858	4x	V.corymbosum	NC
PI554859	4x	V.corymbosum	NC	Murphy x G-125	NHB	Bounty
PI554860	4x	V.corymbosum	NC	Croatan x US 11-93	NHB	Bluechip
PI554861	4x	V.corymbosum	NC
PI554863	4x	V.corymbosum	NC	Angola x Adams	NHB	Morrow
PI554865	4x	V.corymbosum	Finland			Aron
PI554866	4x	V.corymbosum	NJ	(Katharine x Jersey) x Scammell	NHB	Elizabeth
PI554869	4x	V.corymbosum	NC	Patriot x US 74 (Fla 4B x Bluecrop)	SHB	Blue Ridge
PI554873	4x	V.corymbosum	Georgia	G-132 x US 75	SHB	Georgiagem
PI554878	4x	V.corymbosum	New Zealand			Pacific Blue
PI554879	4x	V.corymbosum	NC	NC 1171 x NC SF-12-L	SHB	Reveille
PI554885	4x	V.corymbosum	NJ	GM-37 (Jersey x Pioneer) x CU-5 (Stanley x June)	NHB	Bluecrop
PI554891	4x	V.corymbosum	NJ
PI554892	4x	V.corymbosum	NJ
PI554894	4x	V.corymbosum	Michigan
PI554897	4x	V.corymbosum	NJ
PI554944	4x	V.corymbosum	NC	Wolcott x Fla 4-15	SHB	O'Neal
PI555317	4x	V.corymbosum	NA	Fla 67-1 x Avonblue	SHB	Misty
PI614082	4x	V.corymbosum	NC	Weymouth x F-6 (Stanley x Crabbe 4)	NHB	Wolcott
PI618024	4x	V.corymbosum	NJ
PI618033	4x	V.corymbosum	NA	NC 1171 x NC SF-12-L	SHB	Bladen
PI618065	4x	V.corymbosum	Washington
PI618099	4x	V.corymbosum	NA	US 169 x G-156	NHB	Sierra
PI618147	4x	V.corymbosum	NJ	Pioneer x Rubel	NHB	Hardyblue 1613A
PI618163	4x	V.corymbosum	Minnesota			Polaris
PI618166	4x	V.corymbosum	Australia			Brigitta Blue
PI618168	4x	V.corymbosum	New Zealand			Reka
PI618181	4x	V.corymbosum	Maryland	G-144 x Fla 4-76	SHB	Summit
PI618192	4x	V.corymbosum	Mississippi	(G-67 x E-55) x Beckyblue	Pentaploid	Pearl River
PI618262	4x	V.corymbosum	Australia			Caroline Blue
PI641328	4x	V.corymbosum	NC
PI666656	4x	V.corymbosum	NA
PI554694	6x	V.virgatum	Georgia
PI554695	6x	V.virgatum	Florida	Wild selection	Rabbiteye	Hagood
PI554697	6x	V.virgatum	Georgia			Bluebelle
PI554698	6x	V.virgatum	Georgia	Ethel x Clara	Rabbiteye	Tifblue
PI554699	6x	V.virgatum	Georgia	Myers x Black Giant	Rabbiteye	Callaway
PI554700	6x	V.virgatum	Georgia			Climax
PI554701	6x	V.virgatum	Georgia	Garden Blue x Ethel	Rabbiteye	Southland
PI554703	6x	V.virgatum	Georgia	Tifblue x Menditoo	Rabbiteye	Brightwell
PI554705	6x	V.virgatum	Georgia			Coastal
PI554707	6x	V.virgatum	Georgia	Wild selection	Rabbiteye	Owen
PI554709	6x	V.virgatum	Georgia	Myers x Black Giant	Rabbiteye	Homebell
PI554710	6x	V.virgatum	Florida			Myers
PI554712	6x	V.virgatum	Georgia
PI554713	6x	V.virgatum	Florida
PI554714	6x	V.virgatum	Florida			Suwannee
PI554715	6x	V.virgatum	NC	W-4 × Callaway	Rabbiteye	Centurion
PI554718	6x	V.virgatum	Florida	T-31 (Ethel x Callaway) O.P.	Rabbiteye	Bluegem
PI554719	6x	V.virgatum	Florida	Beckyblue O.P.	Rabbiteye	Bonita
PI554953	6x	Hybrid	Minnesota			Northcountry
PI554956	6x	V.virgatum	Florida	(Florida 6-138) x E-96	Rabbiteye	Beckyblue
PI554959	6x	V.virgatum	Florida			Aliceblue
PI657154	6x	V.virgatum	NC	Premier x Centurion	Rabbiteye	Onslow
* The Information about each accession was extracted from the GRIN database.

## Sheet: Supplementary Table S2
Supplementary Table S2. Metabolites detected in this study
No.	Metabolite class	Abbreviation code	RT(min)*	Detection threshold ug/g fresh	Method
	Anthocyanins
1	Delphinidin-3 -galactoside	Dp-galc	14.4	33.3	HPLC
2	Delphinidin-3 -glucoside	Dp-gluc	15.9	33.3	HPLC
3	Cyanidin-3 -galactoside	Cyn-galc	17.5	33.3	HPLC
4	Delphinidin-3 -arabinoside	Dp-arab	18.8	33.3	HPLC
5	Cyanidin-3 -glucoside	Cyn-gluc	19.8	33.3	HPLC
6	Petunidin-3 -galactoside	Pet-galc	22	33.3	HPLC
7	Cyanidin-3 -arabinoside	Cyn-arab	22.4	33.3	HPLC
8	Petunidin-3 -glucoside	Pet-gluc	24.1	33.3	HPLC
9	Peonidin-3 -galactoside	Peo-galc	25.5	33.3	HPLC
10	Petunidin-3 -arabinoside	Pet-arab	27.2	33.3	HPLC
11	Peonidin 3-glucoside	Peo-gluc	27.8	33.3	HPLC
12	Malvidin-3 -galactoside	Mv-galc	28.7	33.3	HPLC
13	Malvidin-3 -glucoside	Mv-gluc	30.2	33.3	HPLC
14	Malvidin-3 -arabinoside	Mv-arab	32.7	33.3	HPLC
15	Delphinidin-6-acetyl- 3-glucoside	Dp-ac-gluc	35.3	33.3	HPLC
16	Peonidin- 6-acetyl- 3-galactoside	Peo-ac-galc	36.4	33.3	HPLC
17	Cyanidin- 6-acetyl- 3-glucoside	Cn-ac-gluc	36.7	33.3	HPLC
18	Malvidin- 6-acetyl- 3-galactoside	Mv-ac-galc	37	33.3	HPLC
19	Peonidin- 6-acetyl- 3-glucoside	Peo-ac-gluc	37.3	33.3	HPLC
20	Malvidin- 6-acetyl- 3-glucoside	Mv-ac-gluc	38.35	33.3	HPLC
	Phenolic acid
21	Chlorogenic acid	Chlorogenic_acid	8.44	33.3	HPLC
22	Ferulic acid	Ferulic_acid	7.9	21.5	LC-MS
23	Caffeic acid	Caffeic_acid	4.9	7.1	LC-MS
	Flavanol
24	Catechin	Catechin	3.7	13.9	LC-MS
25	epi-catechin	Epi-catechin	6	19.56	LC-MS
26	Procyanidin-B1	Procyanidin-B1	3.3	3.39	LC-MS
27	Procyanidin-B2	Procyanidin-B2	4.8	7.71	LC-MS
	Flavonol
28	Myricetin 3-glucoside	Myricetin-glucoside	9	3.33	LC-MS
29	Quercetin-3-Arabinoside	Quercetin_rutinoside	10.7	9.25	LC-MS
30	Quercetin 3-D-galactoside and/or glucoside	Quercetin_galactoside	10.7	9.66	LC-MS
31	Q-arabinoside and/or pentoside	Quercetin_arabinoside	11.7	6.9	LC-MS
32	Kaempferol -7-O-glucoside	Kaempferol-glucoside	12.2	14.43	LC-MS
33	Syringetin 3-glucoside	Syrengitin-glucoside	13	2.94	LC-MS
* RT indicates the average retention time in minutes the anthocyanin peak was detected

## Sheet: Supplementary Table S3
Supplementary Table S3. Phenotypic variability of metabolites and fruit quality traits.
Traits	Diploid				Tetraploid				Hexaploid
	Min	Max	Fold change		Min	Max	Fold change		Min	Max	Fold change
Fruit quality
Fruit weight (g)	0.1048	0.2208	2.10687		0.1578	2.4509	15.5317		0.3223	1.8628	5.77971
TSS (%)	14.0667	20.75	1.47511		11.3	20.4	1.80531		13.2833	19.9167	1.49938
pH	3.57	3.96	1.10924		3.12	4.88	1.5641		3.2317	3.7633	1.1645
TA (%)	0.2925	1.1354	3.88171		0.1463	1.3378	9.14422		0.2716	0.8827	3.25
Anthocyanin (ug/g)
Delphinidin-3 -galactoside	793.78	1926.61	2.42714		75.5175	898.894	11.9031		128.038	473.303	3.69657
Delphinidin-3 -glucoside	66.1113	180.194	2.72561		1	671.931	671.931		17.669	525.79	29.7577
Cyanidin-3 -galactoside	419.272	1458.31	3.4782		23.4881	503.765	21.4477		158.142	753.313	4.76354
Delphinidin-3 -arabinoside	549.299	1439.06	2.61981		91.8617	1017.2	11.0732		144.44	358.866	2.48454
Cyanidin-3 -glucoside	47.2541	73.1581	1.54819		1	124.306	124.306		29.1684	182.912	6.27089
Petunidin-3 -galactoside	207.174	681.25	3.2883		41.6601	330.16	7.92508		68.41	221.005	3.23059
Cyanidin-3 -arabinoside	299.493	721.807	2.4101		17.6833	370.837	20.9711		116.035	426.034	3.67159
Petunidin-3 -glucoside	39.278	67.5959	1.72096		1	276.773	276.773		1	274.865	274.865
Peonidin-3 -galactoside	134.985	466.634	3.45695		3.605	147.791	40.9961		51.4697	223.27	4.33789
Petunidin-3 -arabinoside	165.084	375.728	2.27598		36.0638	284.025	7.87563		32.8811	143.595	4.36709
Peonidin 3-glucoside	1	47.5274	47.5274		1	121.679	121.679		1	281.657	281.657
Malvidin-3 -galactoside	540.175	1286.61	2.38184		119.405	977.26	8.18441		229.511	874.466	3.81012
Malvidin-3 -glucoside	75.3401	168.957	2.24259		24.1301	488.237	20.2335		76.3141	459.559	6.02194
Malvidin-3 -arabinoside	158.403	366.267	2.31224		86.046	419.374	4.87384		84.4144	262.922	3.11466
Delphinidin-3-(6-acetyl) glucoside	0	0	0		1	405.282	405.282		1	24.9498	24.9498
Peonidin-3-(6-acetyl) galactoside	1	17.4421	17.4421		1	100.999	100.999		1	35.2198	35.2198
Cyanidin-3-(6-acetyl) glucoside	0	0	0		1	162.315	162.315		0	0	0
Malvidin-3-(6-acetyl) galactoside	1	76.1527	76.1527		1	528.122	528.122		1	42.9323	42.9323
Peonidin-3-(6-acetyl) glucoside	0	0	0		1	141.917	141.917		0	0	0
Malvidin-3-(6-acetyl) glucoside	1	8.6113	8.6113		1	412.654	412.654		0	0	0
Total anthocyanin	4002.13	7762.42	1.93957		1066.03	5133	4.81505		1953.62	4166.55	2.13273
Flavanol (ug/g)
Catechin	11.2375	36.7131	3.26702		0.975	70.975	72.7949		1.8889	28.3056	14.9852
epi-catechin	0.7458	3.3417	4.48069		1	23.7277	23.7277		1	12.6944	12.6944
Procyanidin-B1	1	19.7167	19.7167		1	24.5222	24.5222		1	9.1389	9.1389
Procyanidin-B2	1	7.2056	7.2056		1	11.5236	11.5236		1	4.025	4.025
Total Flavanol	19.2389	53.1056	2.76032		1.125	125.353	111.425		5.3861	38.2306	7.09801
Flavonol (ug/g)
Myresitin-3-glucoside	6.7083	38.0872	5.67762		6.31	46.3603	7.34712		1.5583	25.8931	16.6162
Quercetin-3-rutinoside	0.6333	3.85	6.07927		1	281.488	281.488		0.1528	47.2111	308.973
Quercetin 3-D-galactoside and/or glucoside	31.2833	89.2313	2.85236		24.3111	333.848	13.7323		31.9778	96.8593	3.02895
Quercetin-3-arabinoside	7.5875	53.0476	6.99145		5.3333	171.353	32.1289		0.1333	87.7519	658.304
Kaempferol -7-O-glucoside	1	4.7355	4.7355		1	102.04	102.04		1.975	122.806	62.1801
Syringetin 3-glucoside	4.775	38.1833	7.9965		0.1556	63.756	409.743		0.7246	37.4153	51.6358
Total Flavonol	54.6194	186.396	3.41263		78.3667	726.864	9.27517		103.73	268.89	2.59221
Phenolic acids (ug/g)
Ferulic acid	1	19.4667	19.4667		78.3667	726.864	9.27517		5.7472	26.7236	4.64985
Caffeic acid	6.705	26.0583	3.8864		1	28.914	28.914		1	7.6611	7.6611
Chlorogenic acid	371.106	1773.12	4.77795		84.0526	1222.66	14.5463		314.821	1723.99	5.47608
Total phenolic acid	404.606	1793.37	4.43239		105.446	1261.65	11.9649		322.243	1728.9	5.36521

## Sheet: Supplementary Table S4
Supplementary Table S4. Analysis of variance for metabolites content and fruit quality traits of blueberry accessions at ploidy levels over two growing seasons (2017 and 2018).
Ploidy	Diploid						Tetraploid						Hexaploid
Trait	Accession (A),DF=5		Year(Y), DF=1		GxY(DF=5)		A (DF=99)		Y (DF=1)		GxY (DF=99)		A (DF=21)		Y (DF=1)		GxY (DF=21)
	MS	P-value	MS	P-value	MS	P-value	MS	P-value	MS	P-value	MS	P-value	MS	P-value	MS	P-value	MS	P-value
Fruit quality
Fruit weight (g)	0.011831	<.0001	0.000545	<.0001	0.002044	2.76e-15	2.132	<.0001	6.015	<.0001	0.209	<.0001	0.9254	<.0001	0.6664	<.0001	0.2468	<.0001
TSS (%)	45.34	<.0001	10.78	<.0001	2.37	0.021339	14.118	<.0001	10.106	<.0001	3.691	<.0001	18.829	<.0001	21.643	<.0001	2.972	<.0001
pH	0.11971	<.0001	0.0081	0.158	0.01	0.824	0.4465	<.0001	1.5677	<.0001	0.2011	<.0001	0.11802	<.0001	0.01	0.606	0.05837	<.0001
TA (%)	0.8128	<.0001	0.9564	<.0001	0.1964	6.44e-10	0.357	<.0001	8.826	<.0001	0.228	<.0001	0.183	<.0001	9.305	<.0001	0.136	<.0001
Anthocyanin (ug/g)
Delphinidin-3 -galactoside	1.425	<.0001	1.4208	<.0001	0.408	0.005068	3.568	<.0001	5.514	<.0001	0.542	<.0001	1.9007	<.0001	0.5923	0.0177	0.6561	<.0001
Delphinidin-3 -glucoside	2.2519	0.221	0.0177	0.914	1.3105	0.507	39.25	<.0001	21.87	<.0001	10.42	<.0001	29.36	<.0001	36.54	<.0001	14.37	<.0001
Cyanidin-3 -galactoside	2.3503	<.0001	0.4795	0.0436	0.1462	0.2653	4.685	<.0001	0.535	<.0001	0.76	<.0001	2.8482	<.0001	0.8601	<.0001	0.352	<.0001
Delphinidin-3 -arabinoside	1.4977	<.0001	1.3342	<.0001	0.3701	0.007257	2.6427	<.0001	0.8767	<.0001	0.4682	<.0001	1.1478	<.0001	0.0003	0.954	0.5857	<.0001
Cyanidin-3 -glucoside	0.3529	<.0001	0.0754	0.20238	0.036	0.547716	37.94	<.0001	4.98	<.0001	7.3	<.0001	7.639	<.0001	3.02	<.0001	3.596	<.0001
Petunidin-3 -galactoside	2.02	<.0001	7.004	<.0001	1.431	1.89e-05	2.92	<.0001	138.58	<.0001	0.46	<.0001	1.424	<.0001	30.406	<.0001	0.446	<.0001
Cyanidin-3 -arabinoside	1.2278	<.0001	0.2401	0.139	0.089	0.517	8.51	<.0001	12.778	<.0001	2.651	<.0001	2.0085	<.0001	0.5679	<.0001	0.3199	<.0001
Petunidin-3 -glucoside	0.3996	<.0001	0.278	0.031368	0.0644	0.334218	43.16	<.0001	9.61	<.0001	8.82	<.0001	34.56	<.0001	10.73	<.0001	9.44	<.0001
Peonidin-3 -galactoside	2.4016	<.0001	0.6875	0.0159	0.1659	0.1922	14.73	<.0001	126.56	<.0001	8.06	<.0001	3.0206	<.0001	0.0759	0.613242	0.8497	<.0001
Petunidin-3 -arabinoside	0.8482	<.0001	1.8965	<.0001	0.4178	0.04842	2.019	<.0001	6.942	<.0001	0.439	<.0001	6.215	<.0001	25.071	<.0001	3.609	<.0001
Peonidin 3-glucoside	15.86	<.0001	31.03	0.00915	8.206	0.09701	34.49	<.0001	284.9	<.0001	10.14	<.0001	27.34	<.0001	46.75	<.0001	11.62	<.0001
Malvidin-3 -galactoside	1.1201	<.0001	2.1196	<.0001	0.4452	0.041542	2.713	<.0001	9.708	<.0001	0.694	<.0001	1.5495	<.0001	0.5069	<.0001	1.1041	<.0001
Malvidin-3 -glucoside	0.7933	<.0001	0.433	0.045738	0.1092	0.376687	6.166	<.0001	0.563	<.0001	1.078	<.0001	4.255	<.0001	0.326	0.027	0.753	<.0001
Malvidin-3 -arabinoside	1.2737	<.0001	1.2633	0.00774	0.2826	0.13361	1.6061	<.0001	1.2113	<.0001	0.557	<.0001	1.1546	<.0001	0.0016	0.872	0.833	<.0001
Delphinidin-3-(6-acetyl) glucoside							38.12	<.0001	3.28	0.0144	7.94	<.0001	5.484	<.0001	2.064	<.0001	6.25	<.0001
Peonidin-3-(6-acetyl) galactoside	10.044	<.0001	26.18	<.0001	10.472	<.0001	26.58	<.0001	100.52	<.0001	6.87	<.0001	14.33	<.0001	34.16	<.0001	9.52	<.0001
Cyanidin-3-(6-acetyl) glucoside							34.67	<.0001	1.93	0.152	8.3	<.0001
Malvidin-3-(6-acetyl) galactoside	35.12	<.0001	39.08	<.0001	15.63	<.0001	39.07	<.0001	0.92	0.15	8.41	<.0001	19.892	<.0001	6.253	0.0512	13.151	<.0001
Peonidin-3-(6-acetyl) glucoside							43.36	<.0001	0.12	0.633	7.35	<.0001
Malvidin-3-(6-acetyl) glucoside	2.444	0.115	0	1	0	1	46.9	<.0001	1.85	0.0895	7.6	<.0001
Total malvidin	0.9993	<.0001	1.4957	<.0001	0.3283	0.1	1.1696	<.0001	1.7	<.0001	0.49	<.0001	0.69	<.0001	0.1	0.21	0.9	<.0001
Total delphinidin	1.42	<.0001	1.341	<.0001	0.38	<.0001	1.98	<.0001	2.08	<.0001	0.49	<.0001	1.62	<.0001	0.07	0.38	0.65	<.0001
Tota petunidin	0.78	<.0001	1.39	<.0001	0.3081	0.096	1.22	<.0001	9.23	<.0001	0.4	<.0001	1.24	<.0001	0.01	0.72	0.37	<.0001
Total peonidin	3.695	<.0001	18.735	<.0001	1.84	<.0001	7.7	<.0001	460	<.0001	4.8	<.0001	1.29	<.0001	15.656	<.0001	0.74	<.0001
Total cyanidin	1.74	<.0001	0.3636	0.07	0.12	0.34	4.96	<.0001	1.1	<.0001	0.96	<.0001	1.88	<.0001	0.5569	<.0001	0.31	<.0001
TotalANC	0.6095	<.0001	1.2656	<.0001	0.2926	0.044	1.2967	<.0001	0.1171	<.0001	0.3381	<.0001	0.5242	<.0001	0.3913	0.00822	0.4335	<.0001
Flavanol (ug/g)
Catechin	2.6898	<.0001	0.0083	0.495	0.7114	<.0001	8.65	<.0001	73.23	<.0001	4.11	<.0001	6.755	<.0001	0.184	0.342	2.665	<.0001
Epi.catechin	1.317	<.0001	3.302	<.0001	1.064	<.0001	5.21	<.0001	218.67	<.0001	2.44	<.0001	3.36	<.0001	46.43	<.0001	2.45	<.0001
Procyanidin-B1	20.656	<.0001	16.621	<.0001	7.608	<.0001	5	<.0001	404.7	<.0001	4.2	<.0001	2.63	<.0001	156.59	<.0001	2.61	<.0001
Procyanidin-B2	7.976	<.0001	7.335	<.0001	2.941	<.0001	3.39	<.0001	104.47	<.0001	2.64	<.0001	1.802	<.0001	27.551	<.0001	1.814	<.0001
Total Flavanol	3.702	<.0001	2.546	<.0001	1.595	<.0001	8.87	<.0001	313.11	<.0001	5.15	<.0001	3.571	<.0001	27.996	<.0001	3.356	<.0001
Flavonol (ug/g)
Myresitin-3-glucoside	6.48	<.0001	2.873	0.03876	2.938	<.0001	3.33	<.0001	182.91	<.0001	4.36	<.0001	7.016	<.0001	5.932	<.0001	7.74	<.0001
Quercetin-3-rutinoside	0.9266	0.05845	0.1051	0.59907	2.0588	<.0001	13.181	<.0001	0.092	0.537	7.816	<.0001	17.053	<.0001	5.253	<.0001	7.978	<.0001
Quercetin 3-D-galactoside and/or glucoside	1.8859	<.0001	0.1212	0.0163	0.4344	<.0001	2.514	<.0001	9.257	<.0001	2.083	<.0001	3.643	<.0001	0.01	0.75	5.07	<.0001
Quercetin-3-arabinoside	6.767	<.0001	5.989	1.44e-05	1.959	<.0001	6.27	<.0001	102.64	<.0001	3.94	<.0001	23.35	<.0001	3.768	<.0001	6.571	<.0001
Kaempferol -7-O-glucoside	1.3671	0.02805	0.7596	0.20431	1.8794	0.00686	24.03	<.0001	66.87	<.0001	7.61	<.0001	15.425	<.0001	0.776	0.0863	2.109	<.0001
Syringetin 3-glucoside	5.626	<.0001	7.457	7.05e-16	2.444	<.0001	5.22	<.0001	189.16	<.0001	4.67	<.0001	8.12	<.0001	43.42	<.0001	6.49	<.0001
Total Flavonol	2.6018	<.0001	2.0135	3.41e-10	0.6608	<.0001	1.677	<.0001	25.414	<.0001	1.399	<.0001	2.515	<.0001	2.244	<.0001	3.149	<.0001
Phenolic acids (ug/g)
Ferulic acid	16.528	<.0001	0.208	0.236	11.195	<.0001	11.6	<.0001	1058.4	<.0001	7.2	<.0001	5.5	<.0001	373.6	<.0001	3.8	<.0001
Caffeic acid	3.429	<.0001	0.426	0.00668	1.776	<.0001	2.88	<.0001	63.88	<.0001	2.18	<.0001	2.362	<.0001	8.493	<.0001	3.029	<.0001
Chlorogenic acid	4.318	<.0001	0.25	<.0001	0.35	<.0001	3.939	<.0001	14.322	<.0001	0.915	<.0001	3.55	<.0001	6.311	<.0001	0.725	<.0001
Total phenolic acid	3.966	<.0001	0.249	<.0001	0.347	<.0001	3.582	<.0001	19.229	<.0001	0.825	<.0001	3.347	<.0001	7.144	<.0001	0.727	<.0001
